# Supplementary material for: A multifunctional thermosensitive hydrogel based on phototherapy for promoting the healing of dental extraction wounds
Source: Royal Society of Chemistry journal article supplement (doi:10.1039/d4ra03211j), 2024-01-01
Supplement: d4ra03211j1.pdf [file d4ra03211j1.pdf]

## **SUPPORTING INFORMATION for**

### **A Multifunctional Thermosensitive Hydrogel Based on Phototherapy for Promoting the Healing of Dental Extraction Wounds**

Shurui Shi,<sup>a,1,\*</sup> Yunhan Chang,<sup>a,1</sup> Kaiyu Fu,<sup>b</sup> Ning Fu,<sup>c</sup> Xin Hu,<sup>a</sup> Borui Zhao,<sup>a</sup> Bo Chen,<sup>a</sup> Xinyue Yun,<sup>a</sup> Enyu Shi,<sup>a,\*</sup>

*<sup>a</sup>School and Hospital of Stomatology, Tianjin Medical University; Tianjin Key Laboratory of Oral Soft and Hard Tissues Restoration and Regeneration, Tianjin 300070, China. E-mail: [ssrwade@sina.cn](mailto:ssrwade@sina.cn); [shienyukeyan@163.com](mailto:shienyukeyan@163.com).*

*<sup>b</sup>Department of Pediatric Dentistry, Tianjin Stomatological Hospital, School of Medicine, Nankai University, Tianjin, 300041, China.*

*<sup>c</sup>Jingnan Medical Area, Chinese PLA General Hospital, Beijing, 100071, China.*

#### **Author Contributions**

<sup>1</sup> S.S. and Y.C. contributed equally to this work.

#### **Conflicts of interest**

The authors declare no competing financial interest.

#### **Acknowledgements**

This work was supported by the Tianjin Health Research Project (Grant No. TJWJ2021QN037 to S.S.) and the Science & Technology Development Fund of Tianjin Education Commission for Higher Education (Grant No. 2021KJ242 to S.S.).

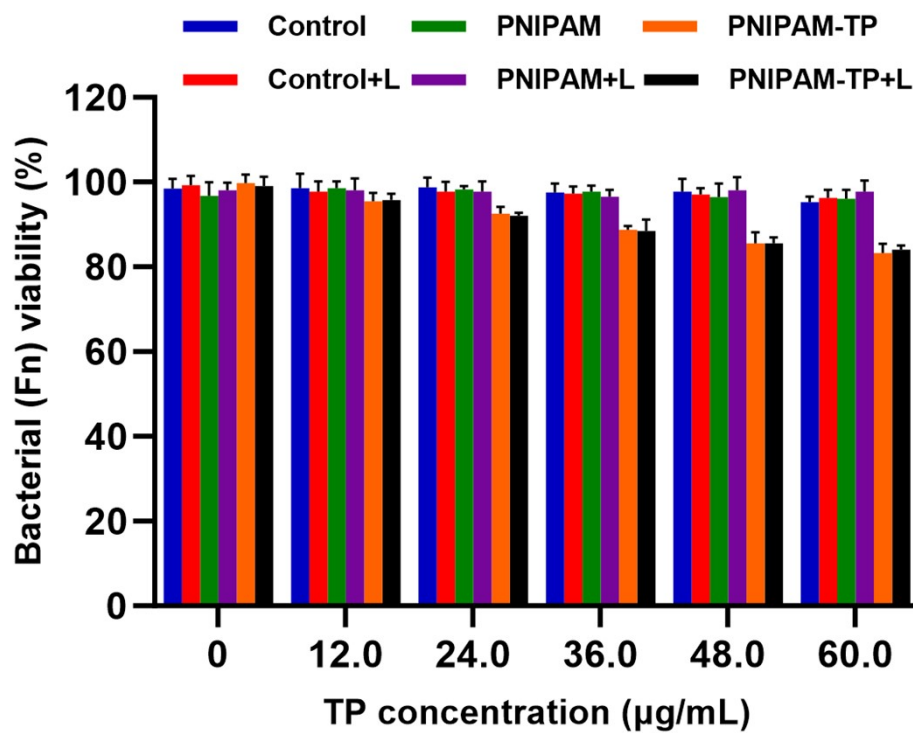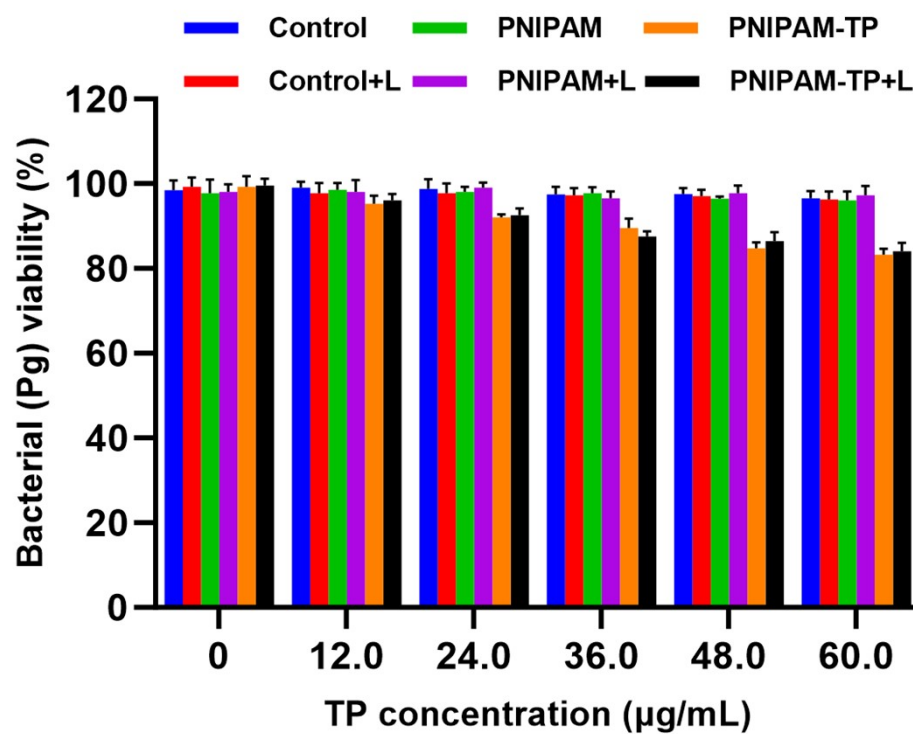

**Fig. S1** Antibacterial effect against Pg and Fn of laser irradiation itself, PNIPAM hydrogel and PNIPAM-TP hydrogel in combination with laser irradiation.

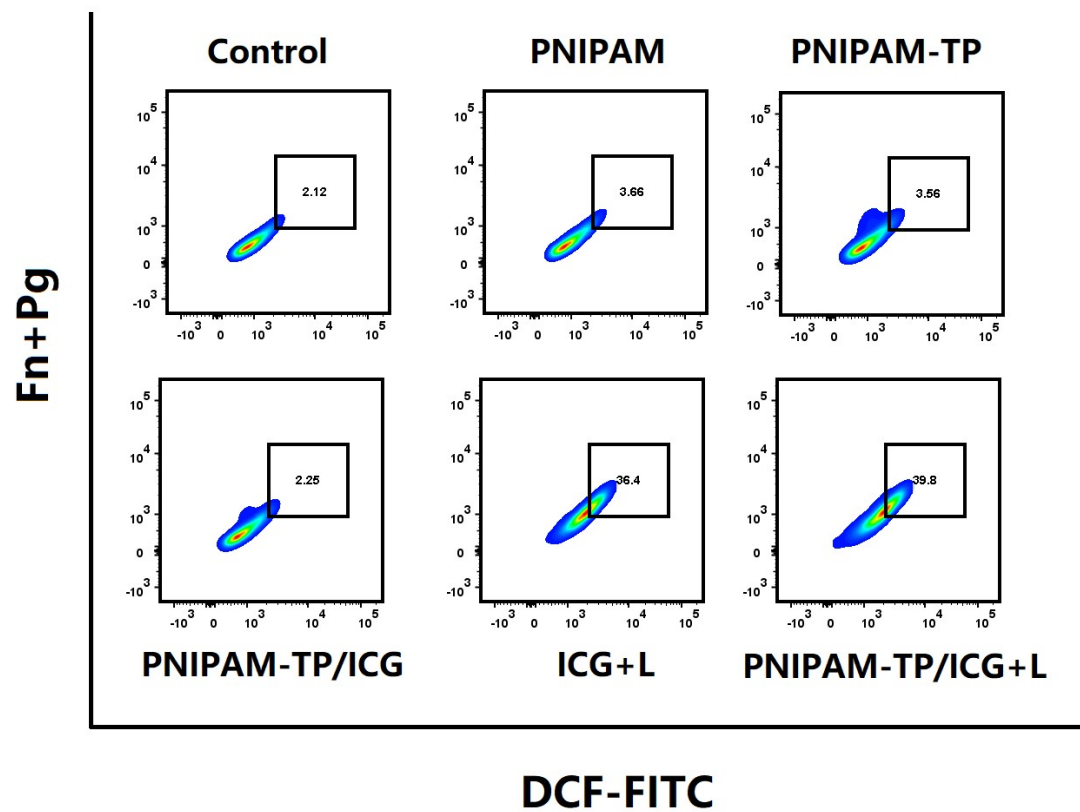

**Fig. S2** Flow cytometry assay of intracellular ROS generation of Pg and Fn triggered by various treatments using DCFH-DA as a fluorescence probe.

**Tab. S1 Blood routine and liver function parameters of rats**

| Parameters          | Control         | PNIPAM-TP/ICG   | PNIPAM-TP/ICG+L | Reference  |
|---------------------|-----------------|-----------------|-----------------|------------|
| WBC ( $10^9/L$ )    | $5.0 \pm 0.7$   | $6.4 \pm 0.5$   | $5.5 \pm 0.5$   | 0.8-6.8    |
| Lymph ( $10^9/L$ )  | $3.5 \pm 0.5$   | $3.7 \pm 0.8$   | $4.8 \pm 0.4$   | 0.7-5.7    |
| Mon ( $10^9/L$ )    | $0.2 \pm 0.1$   | $0.1 \pm 0.1$   | $0.1 \pm 0.1$   | 0.0-0.3    |
| Gran ( $10^9/L$ )   | $1.7 \pm 0.3$   | $2.2 \pm 0.3$   | $2.0 \pm 0.3$   | 0.1-1.8    |
| RBC ( $10^{12}/L$ ) | $9.2 \pm 0.3$   | $9.1 \pm 0.6$   | $9.4 \pm 0.5$   | 6.4-9.4    |
| HGB (g/L)           | $113 \pm 5.7$   | $126 \pm 4.8$   | $121 \pm 6.0$   | 110-143    |
| ALT (U/L)           | $36.5 \pm 1.6$  | $25.4 \pm 2.2$  | $27.1 \pm 2.5$  | 21.5-61.8  |
| AST (U/L)           | $48.2 \pm 7.6$  | $45.1 \pm 6.0$  | $47.7 \pm 6.4$  | 41.6-195.7 |
| ALP (U/L)           | $126.6 \pm 8.1$ | $137.5 \pm 6.8$ | $141.5 \pm 8.6$ | 12.0-611.0 |

WBC: white blood cell; Lymph: Lymphocyt; Mon: Monocyte; Gran: Granulocytes;

RBC: Red blood cell; HGB: Hemoglobin; ALT: *alanine aminotransferase*; AST: *aspartate aminotransferase*; ALP: *alkaline phosphatase*. Data are expressed as mean

$\pm$  SD (n = 3).

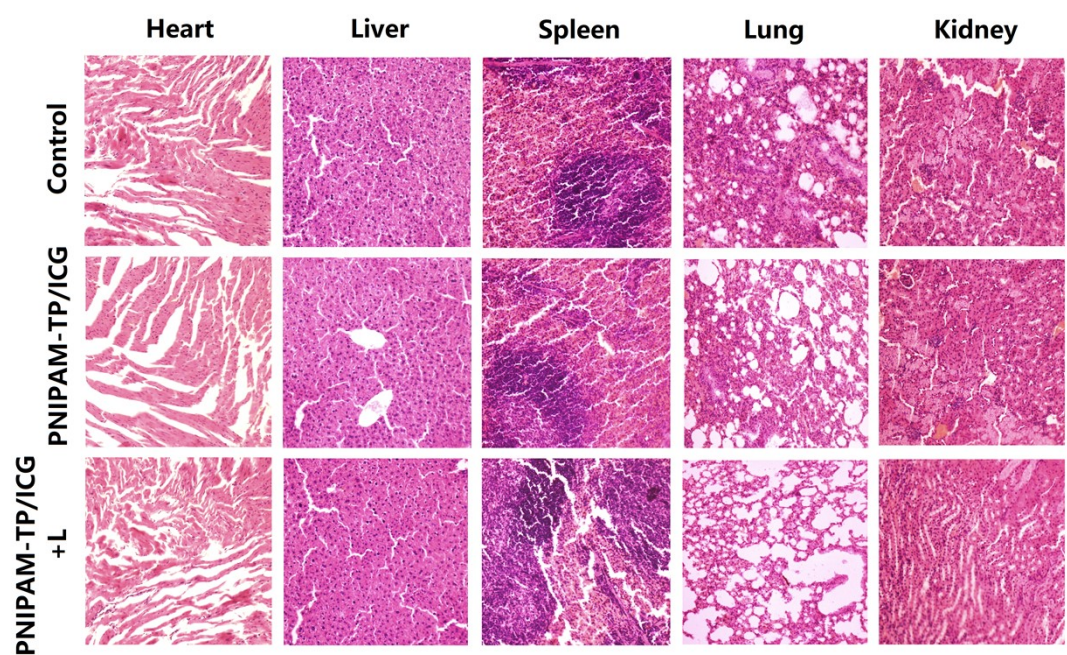

**Fig. S3** Histopathological analysis of main organs (heart, liver, spleen, lung and kidney) stained with H&E after various treatments.
